# Supplementary material for: Biochar’s role in improving pakchoi quality and microbial community structure in rhizosphere soil
Source: PeerJ journal article supplement (doi:10.7717/peerj.16733), 2024-03-18
Supplement: graphical_abstract.pdf [file graphical_abstract.pdf]

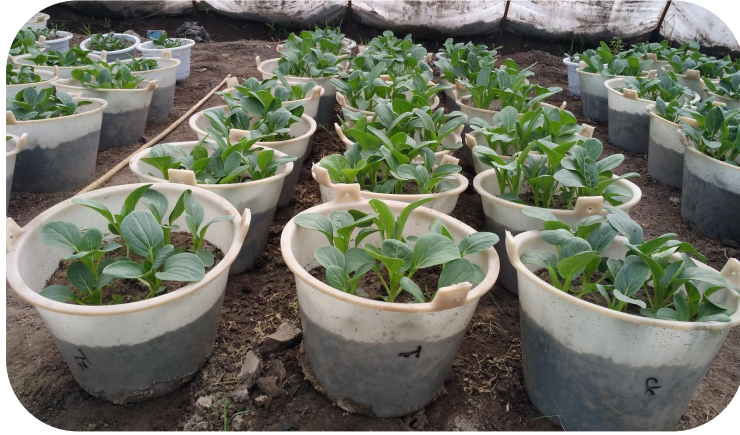

**Cultivation of plant materials**

**Grow for 30 days**

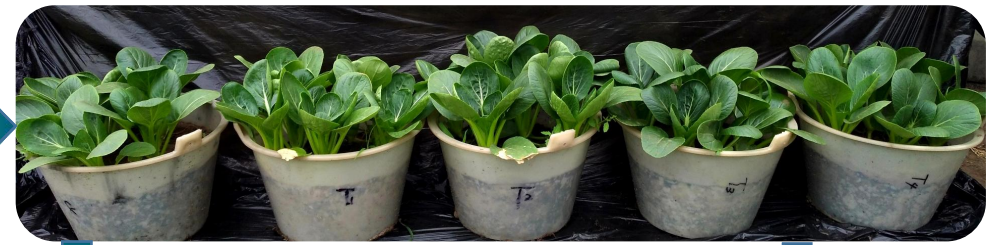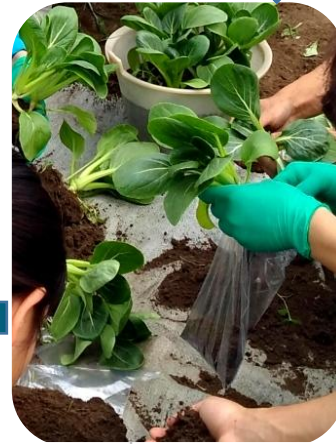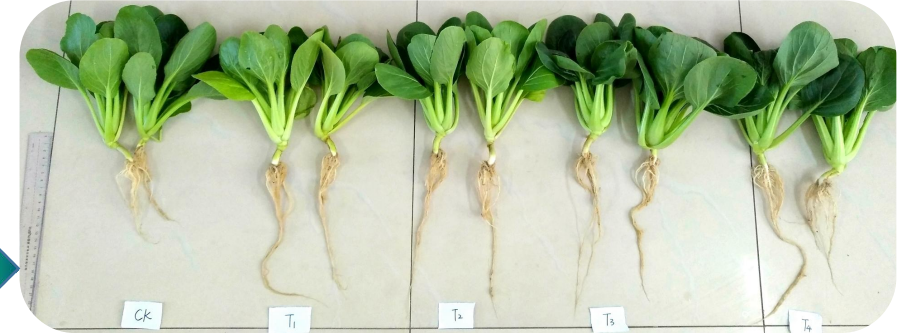

**Investigation of biomass**

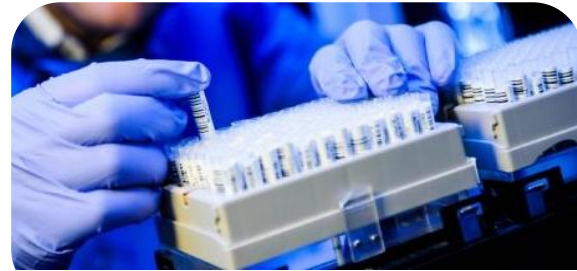

**soil DNA extraction**

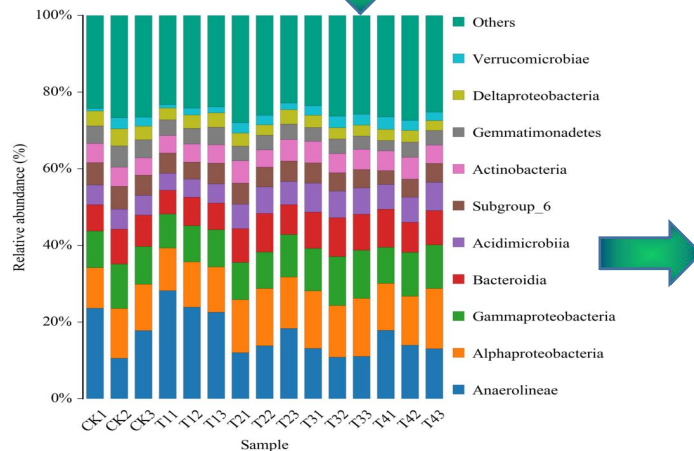

**Analysis of soil microbial diversity**

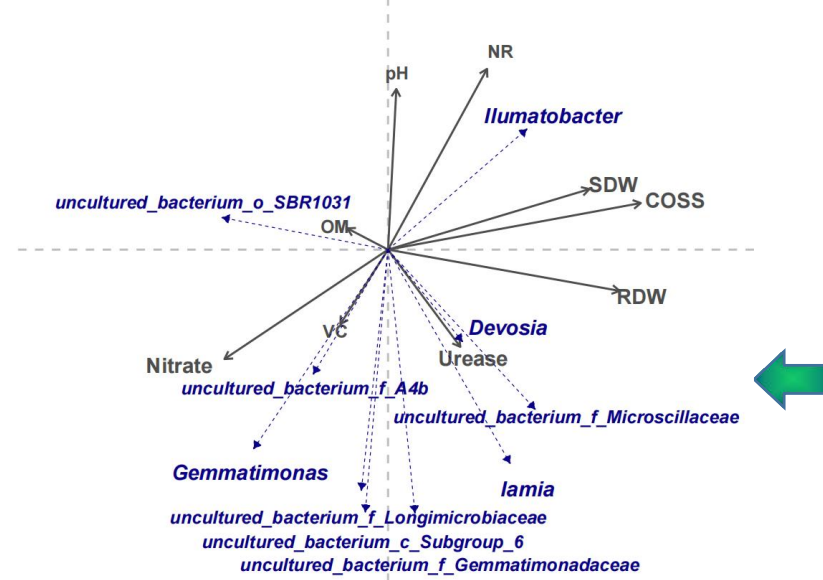

**Redundancy analysis**

**Table 3. Effects of different cultivation modes on the quality of Chinese cabbage.**

| Treatments | Soluble sugar (mg·100g <sup>-1</sup> ) | Soluble protein (mg·g <sup>-1</sup> ) | VC (mg·100g <sup>-1</sup> ) | Cellulose (%) | Nitrate (mg·kg <sup>-1</sup> ) | Nitrite reductase [ $\mu\text{g}\cdot\text{g}^{-1}\cdot\text{h}^{-1}$ ] |
|------------|----------------------------------------|---------------------------------------|-----------------------------|---------------|--------------------------------|-------------------------------------------------------------------------|
| CK         | 25.76±1.90b                            | 1.44±0.02b                            | 4.32±0.54b                  | 1.70±0.07d    | 286.93±5.86b                   | 50.79±1.62b                                                             |
| T1         | 41.01±1.15a                            | 1.55±0.05b                            | 3.06±0.31b                  | 2.58±0.10c    | 257.71±0.59c                   | 57.54±5.03b                                                             |
| T2         | 39.18±2.33a                            | 1.65±0.08a                            | 5.50±0.41a                  | 3.96±0.25b    | 225.67±0.44d                   | 75.89±3.01a                                                             |
| T3         | 14.46±0.48d                            | 1.56±0.12b                            | 6.30±1.38a                  | 4.56±0.18a    | 301.48±0.69a                   | 88.86±4.01a                                                             |
| T4         | 20.01±0.69c                            | 1.54±0.06b                            | 5.40±1.08a                  | 2.89±0.16c    | 288.08±9.01b                   | 86.84±1.05a                                                             |

**Quality of measurement**
